# Supplementary material
Source: PubMed Central journal article supplement (PMC4477844)
Supplement: NIHMS701426-supplement-2.pdf [file NIHMS701426-supplement-2.pdf]

# Kinetic Dispersion in Redox Active Dithiocarbamate Monolayers

*Amanda L. Eckermann, Justine A. Shaw, Thomas J. Meade\**

Departments of Chemistry, Biochemistry and Molecular and Cell Biology, Neurobiology and Physiology, and Radiology, Northwestern University, 2145 Sheridan Road, Evanston, IL 60208

tmeade@northwestern.edu

## Supporting Information

|                                                                                                                                                                                                                                                             |     |
|-------------------------------------------------------------------------------------------------------------------------------------------------------------------------------------------------------------------------------------------------------------|-----|
| Table of neat ferrocene dtc CV parameters.....                                                                                                                                                                                                              | 2   |
| Examples of ACV $i_p/i_b$ plots for 10, 100, 1000, and 10000 s <sup>-1</sup> .....                                                                                                                                                                          | 3   |
| Example of ACV $i_p/i_b$ plot for a distribution of rates .....                                                                                                                                                                                             | 3   |
| CVs and ACV $i_p/i_b$ plots and fits for FcCONH(CH <sub>2</sub> ) <sub>15</sub> SH.....                                                                                                                                                                     | 4   |
| Tafel plot fit data for <b>FcC16dtc/C16dtc</b> , <b>FcC16dtc/C18dtc</b> , <b>FcC16dtc/CO<sub>2</sub>C16dtc</b> ,<br><b>FcCO<sub>2</sub>dtc/C16dtc</b> , <b>FcCO<sub>2</sub>C16dtc/C18dtc</b> , and <b>FcCO<sub>2</sub>C16dtc/CO<sub>2</sub>C16dtc</b> ..... | 5   |
| Tafel plots for <b>FcC16dtc/C16dtc</b> , <b>FcC16dtc/C18dtc</b> , and <b>FcC16dtc/CO<sub>2</sub>dtc</b> ,<br><b>FcCO<sub>2</sub>dtc/C16dtc</b> , <b>FcCO<sub>2</sub>C16dtc/C18dtc</b> , and <b>FcCO<sub>2</sub>dtc/CO<sub>2</sub>C16dtc</b> .....           | 6-7 |
| Comparison of ACV $i_p/i_b$ plots for FcC16dtc/C16dtc high surface coverage (1:3) and low surface coverage (1:9).....                                                                                                                                       | 8   |
| Marcus density-of-states equations.....                                                                                                                                                                                                                     | 9   |
| <sup>1</sup> H NMR and ESI-MS data.....                                                                                                                                                                                                                     | 10  |

Table of neat ferrocene dtc CV parameters.

|                    | $E_{1/2}$ | $\Delta E_p$ | FWHM   | coverage |
|--------------------|-----------|--------------|--------|----------|
| <b>FcC11dtc</b>    | 275       | 26           | 80-115 | 1.80E-10 |
|                    |           |              |        |          |
| <b>FcC16dtc</b>    | 264       | 17           | 80-105 | 2.30E-10 |
|                    |           |              |        |          |
| <b>FcCO2C16dtc</b> | 532       | 9            | 80-90  | 2.50E-10 |

Examples of ACV  $i_p/i_b$  plots for 10, 100, 1000, and 10000 s<sup>-1</sup> Example of ACV  $i_p/i_b$  plot for a distribution of rates

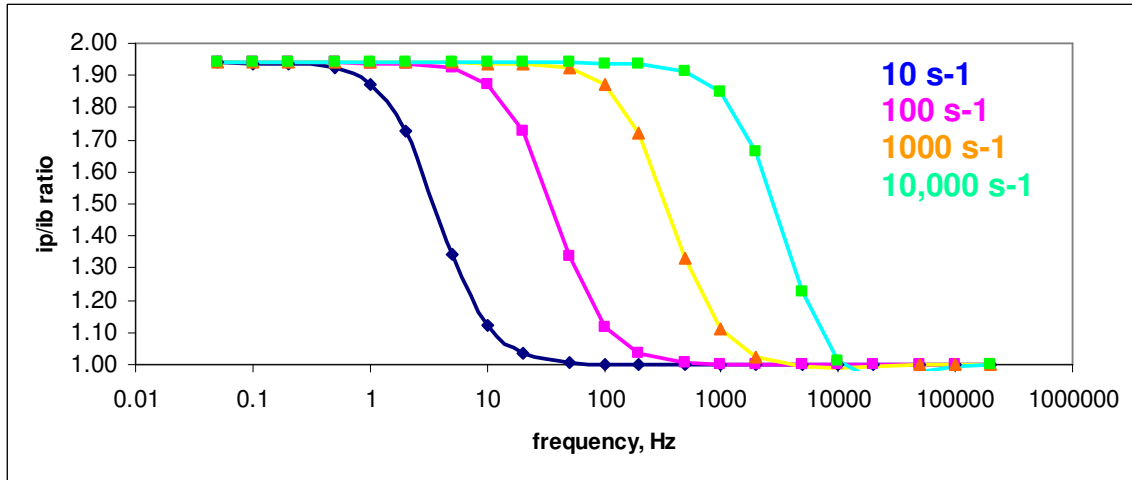

Example of ACV  $i_p/i_b$  plot for a distribution of rates (25% 10 s<sup>-1</sup>; 25% 100 s<sup>-1</sup>; 25% 1,000 s<sup>-1</sup>, 25% 10,000s<sup>-1</sup>)

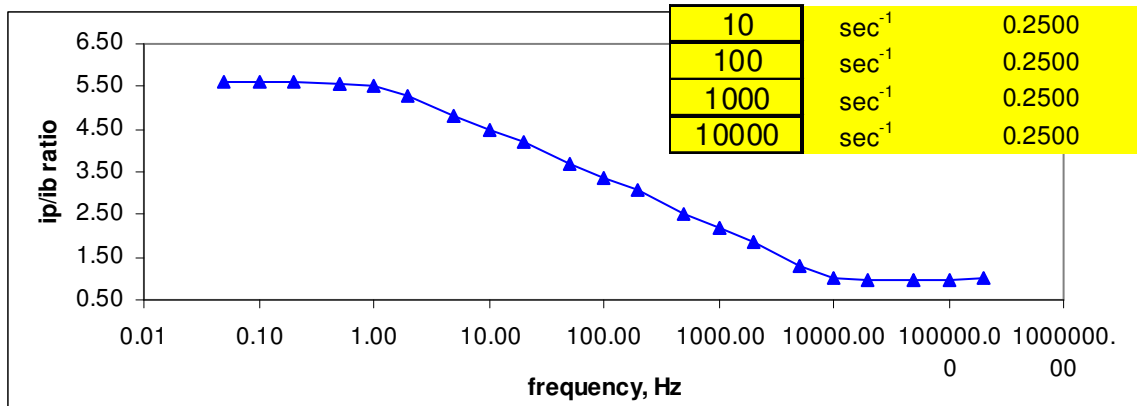

Variations within rate ranges affect the fit of the simulation to a segment of the  $i_p/i_b$  ratio plot. For example, variations of the fit within the 5,000-10,000 s<sup>-1</sup> range affect the simulated  $i_p/i_b$  data at high frequencies while changes within the 1-100 s<sup>-1</sup> range affect the simulated data at low frequencies.

FcCONH(CH<sub>2</sub>)<sub>15</sub>SH CVs for a range of scan rates.

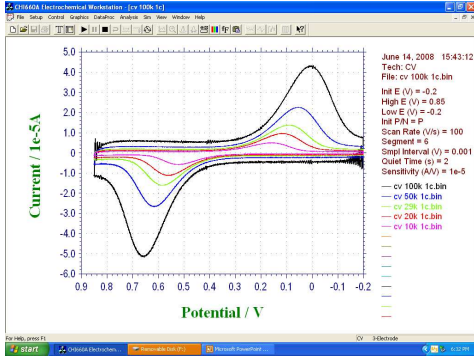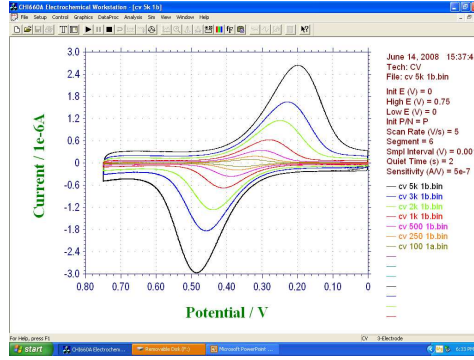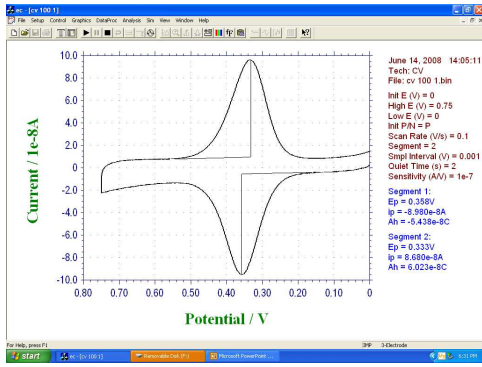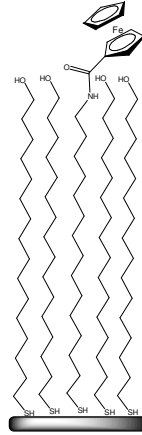

FcCONH(CH<sub>2</sub>)<sub>15</sub>SH ACV ip/ib plots with fit data (experiment, red; simulation, black)

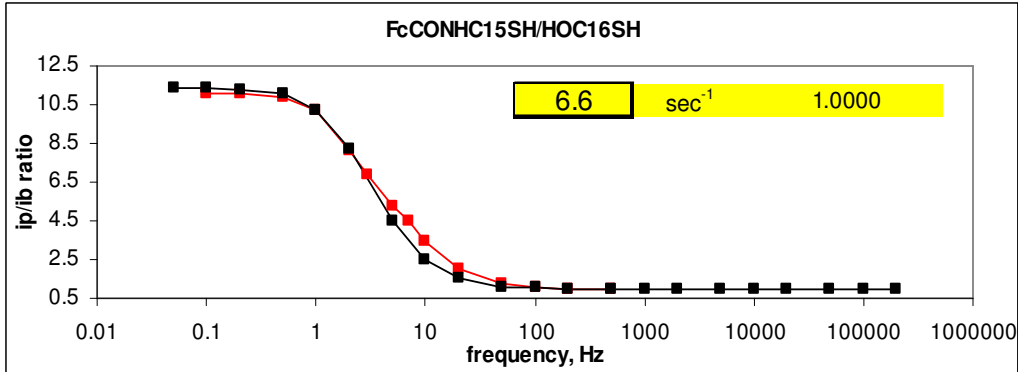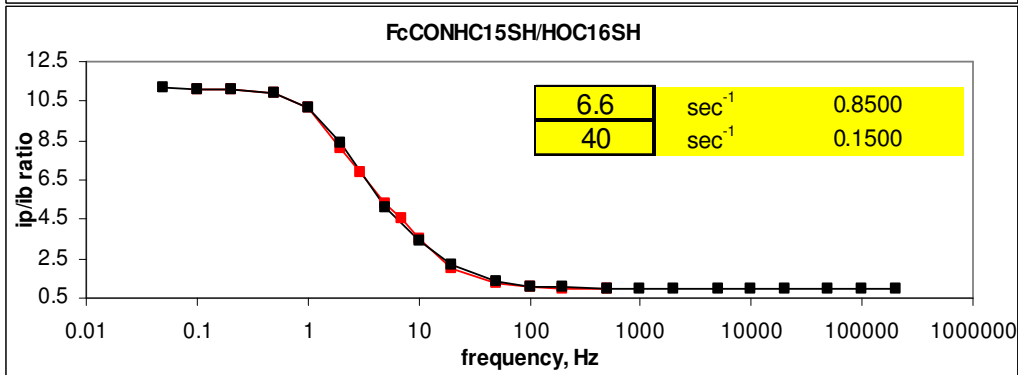

Tafel plot fit data.

For the “wide” fit, the fitting algorithm was allowed to range between 0.2-1.1eV for lambda. For the “narrow” fit, lambda was constrained to 0.8-0.9eV. The “goof” is the goodness-of-fit and a value <1 indicates a good fit.

|           |              | wide     |          |
|-----------|--------------|----------|----------|
|           |              | valley   | peak     |
| FcC16/C16 | lambda(eV)   | 0.71     | 0.61     |
|           | k0 (s-1)     | 349      | 98       |
|           | coupling(eV) | 3.96E-05 | 1.20E-05 |
|           | (goof)       | 0.68     | 0.63     |

|           |              | narrow   |          |
|-----------|--------------|----------|----------|
|           |              | valley   | peak     |
| FcC16/C16 | lambda(eV)   | 0.81     | 0.81     |
|           | k0 (s-1)     | 259      | 88       |
|           | coupling(eV) | 5.97E-05 | 3.48E-05 |
|           | (goof)       | 1.19     | 0.89     |

|           |              | wide     |          |
|-----------|--------------|----------|----------|
|           |              | valley   | peak     |
| FcC16/C18 | lambda(eV)   | 1.01     | 0.91     |
|           | k0 (s-1)     | 0.28     | 0.85     |
|           | coupling(eV) | 5.97E-06 | 5.97E-06 |
|           | (goof)       | 0.68     | 1.22     |

|           |              | narrow   |          |
|-----------|--------------|----------|----------|
|           |              | valley   | peak     |
| FcC16/C18 | lambda(eV)   | 0.98     | 0.92     |
|           | k0 (s-1)     | 0.39     | 0.76     |
|           | coupling(eV) | 5.97E-06 | 5.97E-06 |
|           | (goof)       | 0.09     | 1.11     |

|           |              | wide     |          |
|-----------|--------------|----------|----------|
|           |              | valley   | peak     |
| FcC16/CO2 | lambda(eV)   | 0.41     | 0.51     |
|           | k0 (s-1)     | 243      | 996      |
|           | coupling(eV) | 5.97E-06 | 2.15E-05 |
|           | (goof)       | 1.02     | 0.22     |

|           |              | narrow   |          |
|-----------|--------------|----------|----------|
|           |              | valley   | peak     |
| FcC16/CO2 | lambda(eV)   | 0.81     | 0.81     |
|           | k0 (s-1)     | 166      | 259      |
|           | coupling(eV) | 4.78E-05 | 5.97E-05 |
|           | (goof)       | 2.63     | 10.73    |

|           |              | wide     |          |
|-----------|--------------|----------|----------|
|           |              | valley   | peak     |
| FcCO2/C16 | lambda(eV)   | 0.51     | 0.61     |
|           | k0 (s-1)     | 153      | 1055     |
|           | coupling(eV) | 8.45E-06 | 3.91E-05 |
|           | (goof)       | 0.73     | 0.04     |

|           |              | narrow   |          |
|-----------|--------------|----------|----------|
|           |              | valley   | peak     |
| FcCO2/C16 | lambda(eV)   | 0.81     | 0.81     |
|           | k0 (s-1)     | 111      | 258      |
|           | coupling(eV) | 3.90E-05 | 5.97E-05 |
|           | (goof)       | 1.74     | 9.32     |

|           |              | wide     |          |
|-----------|--------------|----------|----------|
|           |              | valley   | peak     |
| FcCO2/C18 | lambda(eV)   | 0.51     | 0.71     |
|           | k0 (s-1)     | 77       | 762      |
|           | coupling(eV) | 5.97E-06 | 5.85E-05 |
|           | (goof)       | 0.48     | 0.35     |

|           |              | narrow   |          |
|-----------|--------------|----------|----------|
|           |              | valley   | peak     |
| FcCO2/C18 | lambda(eV)   | 0.81     | 0.81     |
|           | k0 (s-1)     | 57       | 258      |
|           | coupling(eV) | 2.80E-05 | 5.97E-05 |
|           | (goof)       | 1.35     | 7.05     |

|           |              | wide     |          |
|-----------|--------------|----------|----------|
|           |              | valley   | peak     |
| FcCO2/CO2 | lambda(eV)   | 0.51     | 0.51     |
|           | k0 (s-1)     | 77       | 383      |
|           | coupling(eV) | 5.97E-06 | 1.33E-05 |
|           | (goof)       | 1.85     | 0.87     |

|           |              | narrow   |          |
|-----------|--------------|----------|----------|
|           |              | valley   | peak     |
| FcCO2/CO2 | lambda(eV)   | 0.81     | 0.81     |
|           | k0 (s-1)     | 70       | 259      |
|           | coupling(eV) | 3.10E-05 | 5.97E-05 |
|           | (goof)       | 2.52     | 1.42     |

Tafel plots.

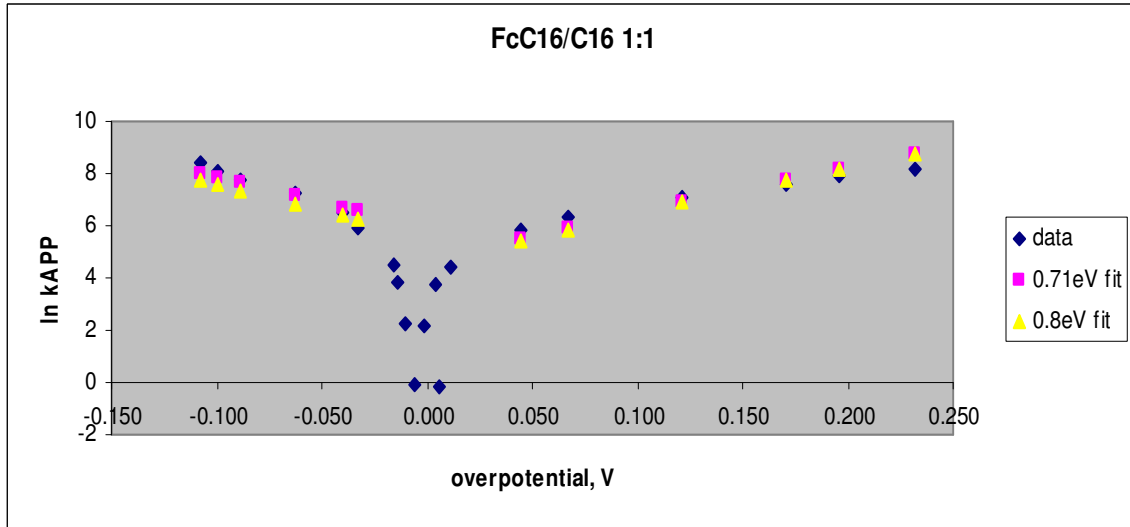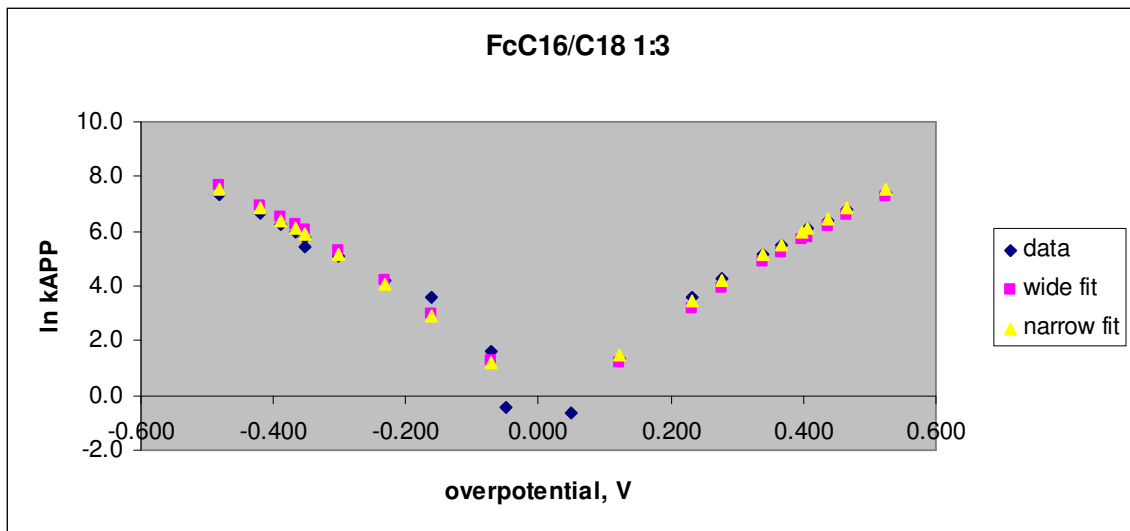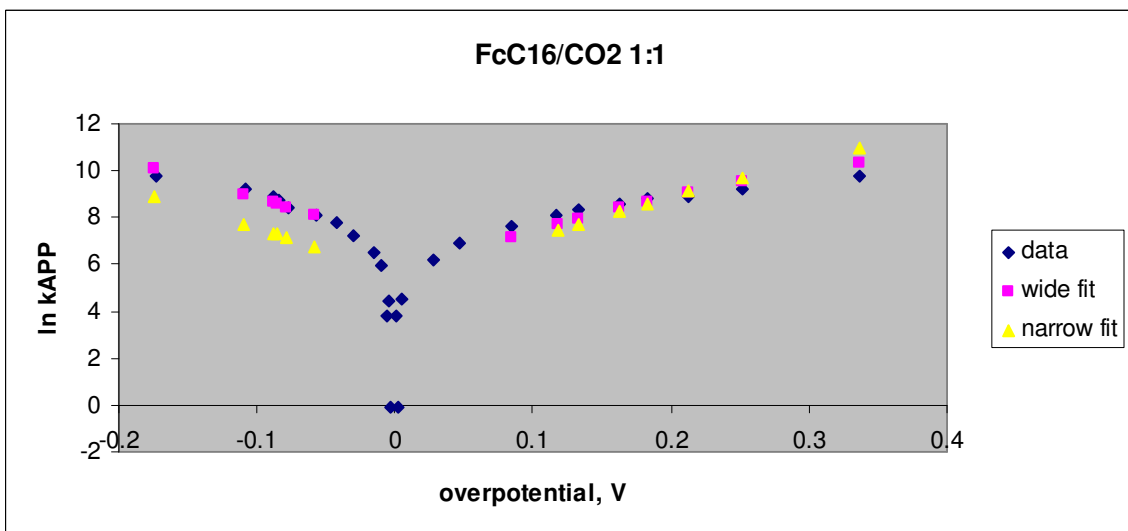

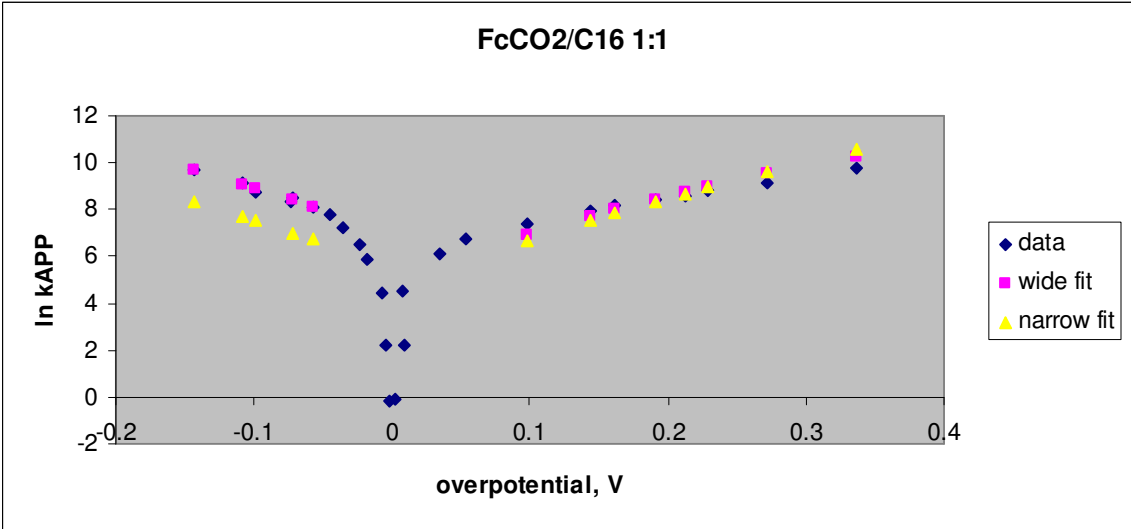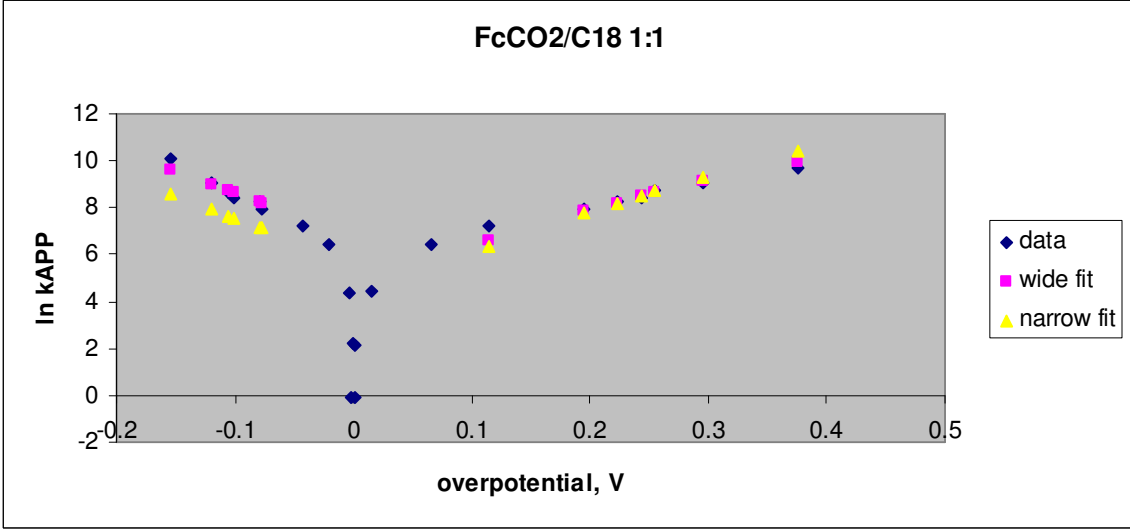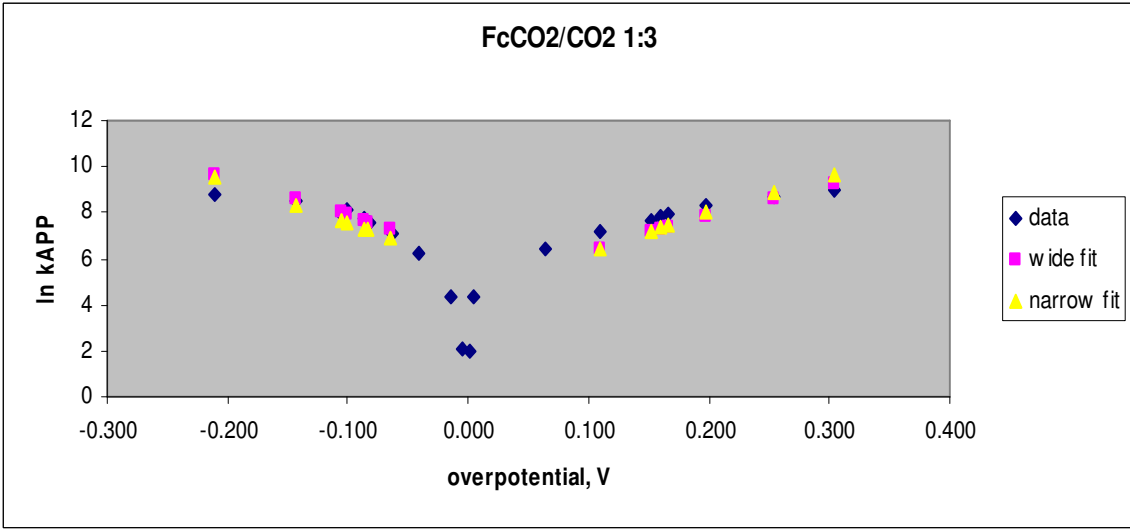

Comparison of ACV ip/ib plots for **FcC16dte/C16dte** high surface coverage (1:3) and low surface coverage (1:9). The two plots can be fit to a similar distribution of rates.

1:3

| rate  |                   | weight |
|-------|-------------------|--------|
| 300   | sec <sup>-1</sup> | 0.20   |
| 1000  | sec <sup>-1</sup> | 0.40   |
| 3000  | sec <sup>-1</sup> | 0.15   |
| 35000 | sec <sup>-1</sup> | 0.25   |

1:9

| rate  |                   | weight |
|-------|-------------------|--------|
| 150   | sec <sup>-1</sup> | 0.20   |
| 1000  | sec <sup>-1</sup> | 0.40   |
| 2000  | sec <sup>-1</sup> | 0.15   |
| 35000 | sec <sup>-1</sup> | 0.25   |

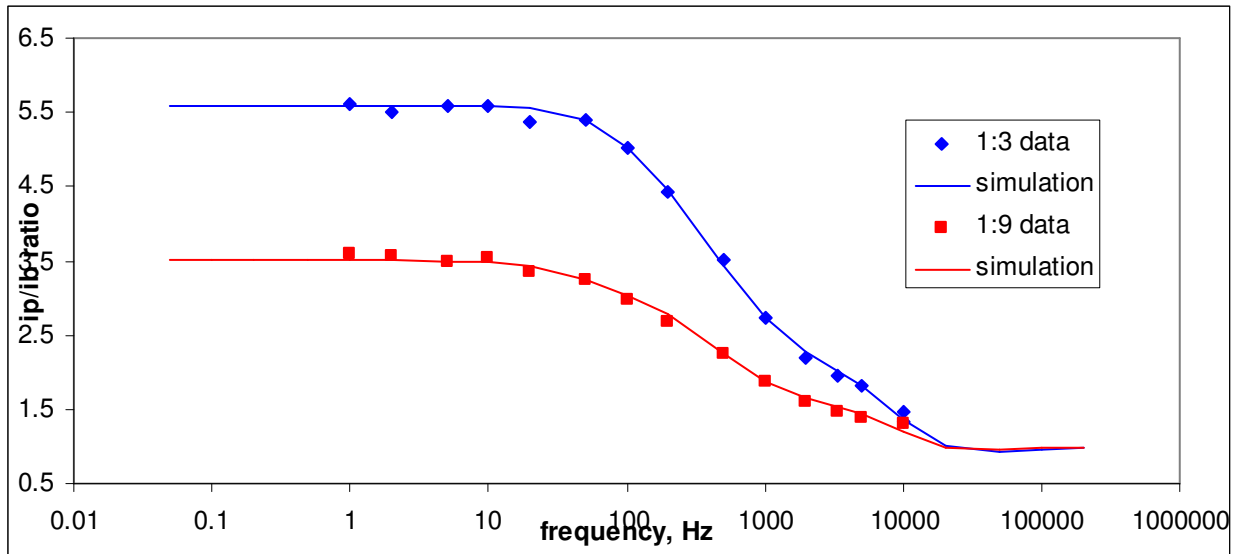



## Details of Marcus density-of-states theory

Apparent cathodic and anodic rate constants are calculated as a function of overpotential for electron transfer between a redox-active molecule and a metal electrode using Marcus theory. The ET rate at a given overpotential is calculated via numerical integration of donor and acceptor levels over a range of energies  $\varepsilon$ , the energy level relative to the Fermi energy level of a metal (Equation 1).<sup>1</sup>

$$k_{ox} = A \int_{-\infty}^{\infty} d\varepsilon D_{ox}(\varepsilon) \rho(\varepsilon) f(\varepsilon) \quad \text{Equation 1}$$

$$D_{ox}(\varepsilon) = \frac{1}{\sqrt{4\pi\lambda k_b T}} \exp\left(-\frac{(\lambda - \varepsilon + e_0 \eta)^2}{4\lambda k_b T}\right) \quad \text{Equation 2}$$

The Fermi function  $f(\varepsilon)$  of the metal gives the probability that a given available electron energy state will be occupied at a given temperature.<sup>2</sup> The density of states of the metal,  $\rho(\varepsilon)$ , is assumed to be constant over the range of energies used to evaluate the integral since the density of states varies slowly near the Fermi level.<sup>3</sup> The distribution of electron acceptor levels of the redox center is represented by a Gaussian function  $D_{ox}(\varepsilon)$  whose widths are defined as the reorganization energy (Equation 2). The reorganization energy parameter  $\lambda$  can be partitioned into inner- ( $\lambda_i$ ) and outer-sphere ( $\lambda_o$ ) reorganization energy components. The inner-sphere component  $\lambda_i$  is related to the changes in bond lengths and angles that accompany the change in redox state of the redox species. An analytical expression for the outer-sphere reorganization energy of electron transfer between a redox center (approximated as a spherical cavity) and an electrode in a dielectric continuum is shown in Equation 3. In this expression for  $\lambda_o$ ,  $e$  is the electron charge,  $N_A$  is Avogadro's number,  $a$  is the radius of the redox center,  $d$  is the distance between the redox center and the electrode,  $\varepsilon_s$  is the static dielectric constant of the solvent, and

$\epsilon_{op}$  is the optical frequency dielectric constant. The preintegral factor, A in Equation 1, includes factors such as electronic coupling, the probability of tunneling through an electronic barrier and surface coverage of redox active sites.

$$\lambda_o = \left( \frac{e^2 N_A}{2} \right) \left( \frac{1}{a} - \frac{1}{2d} \right) \left( \frac{1}{\epsilon_{op}} - \frac{1}{\epsilon_s} \right)$$

Equation 3

1. Chidsey, C. E. D., *Science* **1991**, 251, (4996), 919-22.
2. Kittel, C., *Introduction to Solid State Physics*. 4th Edition; John Wiley & Sons: 1971.
3. Schmickler, W., *Interfacial Electrochemistry*. Oxford University Press: 1996.

### 1H NMR data and ESI-MS data

**FcC11** 86% <sup>1</sup>H NMR (401 MHz, CDCl<sub>3</sub>) δ 4.07 (s), 4.02 (d), 2.63 (t), 2.29 (t), 1.54 (m), 1.47 (m), 1.25 (m), 0.87 (s). ESI-MS m/e Calcd 523.4 Found [M+H] 524.3 **FcC16** 53% <sup>1</sup>H NMR (500 MHz, CDCl<sub>3</sub>) δ 4.08 (s), 4.04 (s), 4.02 (s), 2.65 (m), 2.30 (m), 1.57 (m), 1.48 (m), 1.25 (m), 0.88 (t). ESI-MS m/e Calcd 649.5 Found [M+H] 650.5 **FcCO2C16** 84% <sup>1</sup>H NMR (499 MHz, CDCl<sub>3</sub>) δ 4.74 (s), 4.32 (s), 4.14 (m), 2.75 (s), 1.65 (m), 1.36 (m), 1.18 (m), 0.81 (t). ESI-MS m/e Calcd 693.5 Found [M+H] 694.5 **C16** 35% <sup>1</sup>H NMR (500 MHz, CDCl<sub>3</sub>) 2.84 (m), 1.8 (m), 1.25 (m), 0.88 (t). ESI-MS Calcd 465.5 Found [M+] 465.2 **CO2C16** 76% <sup>1</sup>H NMR (500 MHz, CDCl<sub>3</sub>) 3.67 (s), 2.59 (t), 2.30 (t), 1.49 (m), 1.25 (m), 0.88 (t). ESI-MS Calcd 532.5 Found [M+H] 533.9
